# Supplementary material for: Ethanol gas-phase ammoxidation to acetonitrile: the reactivity of supported vanadium oxide catalysts
Source: Royal Society of Chemistry journal article supplement (doi:10.1039/c6cy01275b), 2016-12-01
Supplement: c6cy01275b1.pdf [file c6cy01275b1.pdf]

## Supporting information

### Ethanol Gas-Phase Ammoxidation to Acetonitrile: the Reactivity of Supported Vanadium Oxide Catalysts

Table S1. Catalytic ammoxidation of alcohols in gas and liquid phase.

| Catalyst                                                | T (°C)<br>(GP/LP) | Alcohol           | Alcohol/H <sub>2</sub> O/NH <sub>3</sub> /O <sub>2</sub><br>(molar ratios) | Alcohol conv.,<br>RCN yield (%) | Main<br>byproducts | Ref |
|---------------------------------------------------------|-------------------|-------------------|----------------------------------------------------------------------------|---------------------------------|--------------------|-----|
| MnO <sub>2</sub>                                        | 100, LP           | Benzyl<br>alcohol | 0.5 mmol/--/<br>0.85MPa/0.5MPa                                             | 100, 100                        | -                  | 25  |
| Co <sub>3</sub> O <sub>4</sub>                          | 100, LP           | Benzyl<br>alcohol | 0.5 mmol/--/<br>0.85MPa/0.5MPa                                             | 96, 94                          | -                  | 25  |
| V/P/Sb/O-<br>Al <sub>2</sub> O <sub>3</sub>             | 400, GP           | Ethanol           | Ethanol/water ½ v/v;<br>NH <sub>3</sub> /air 2.1/1                         | 84, 82                          | acetaldehyde       | 33  |
| SAPO                                                    | 350, GP           | Ethanol           | 1/1/5/air                                                                  | 100, 99                         | -                  | 31  |
| VAPO                                                    | 350, GP           | Ethanol           | 1/1/5/air                                                                  | 100, 96.5*                      | acetaldehyde       | 32  |
| Ru(OH) <sub>3</sub> -<br>Al <sub>2</sub> O <sub>3</sub> | 120, LP           | Benzyl<br>alcohol | NH <sub>3</sub> /alcohol 1.8/1;<br>air 6 bar                               | -, 72                           |                    | 29  |

\* We were not able to reproduce these results

Table S2. Porosimetry of catalysts.

| Sample           | BET (m <sup>2</sup> /g) | VO <sub>x</sub> surface density (nm <sup>-2</sup> )* | t-Plot Micropore Area (m <sup>2</sup> /g) |
|------------------|-------------------------|------------------------------------------------------|-------------------------------------------|
| TiO <sub>2</sub> | 22,0                    |                                                      | 9,5                                       |
| ZrO <sub>2</sub> | 26,5                    |                                                      | 0,6                                       |
| V/Ti/O           | 21,3                    | 21,8                                                 | 4,6                                       |
| V/Zr/O           | 24,2                    | 19,1                                                 | 1,9                                       |

\*The VO<sub>x</sub> surface density was calculated according to the following equation:

$$n_5(\text{VO}_x \text{ nm}^{-2}) = \frac{c_w N_A}{M_w S_{\text{BET}} \times 10^{18} (\text{nm}^2/\text{m}^2)}$$

In the above equation,  $c_w$  (g/g) is the Vanadium content of catalysts,  $N_A$  the Avogadro's number ( $6.022 \times 10^{23} \text{ mol}^{-1}$ ),  $M_w$  the molecular weight of Vanadium ( $50.94 \text{ g mol}^{-1}$ ) and  $S_{\text{BET}}$  ( $\text{m}^2 \text{ g}^{-1}$ ) is the surface area of the catalysts.

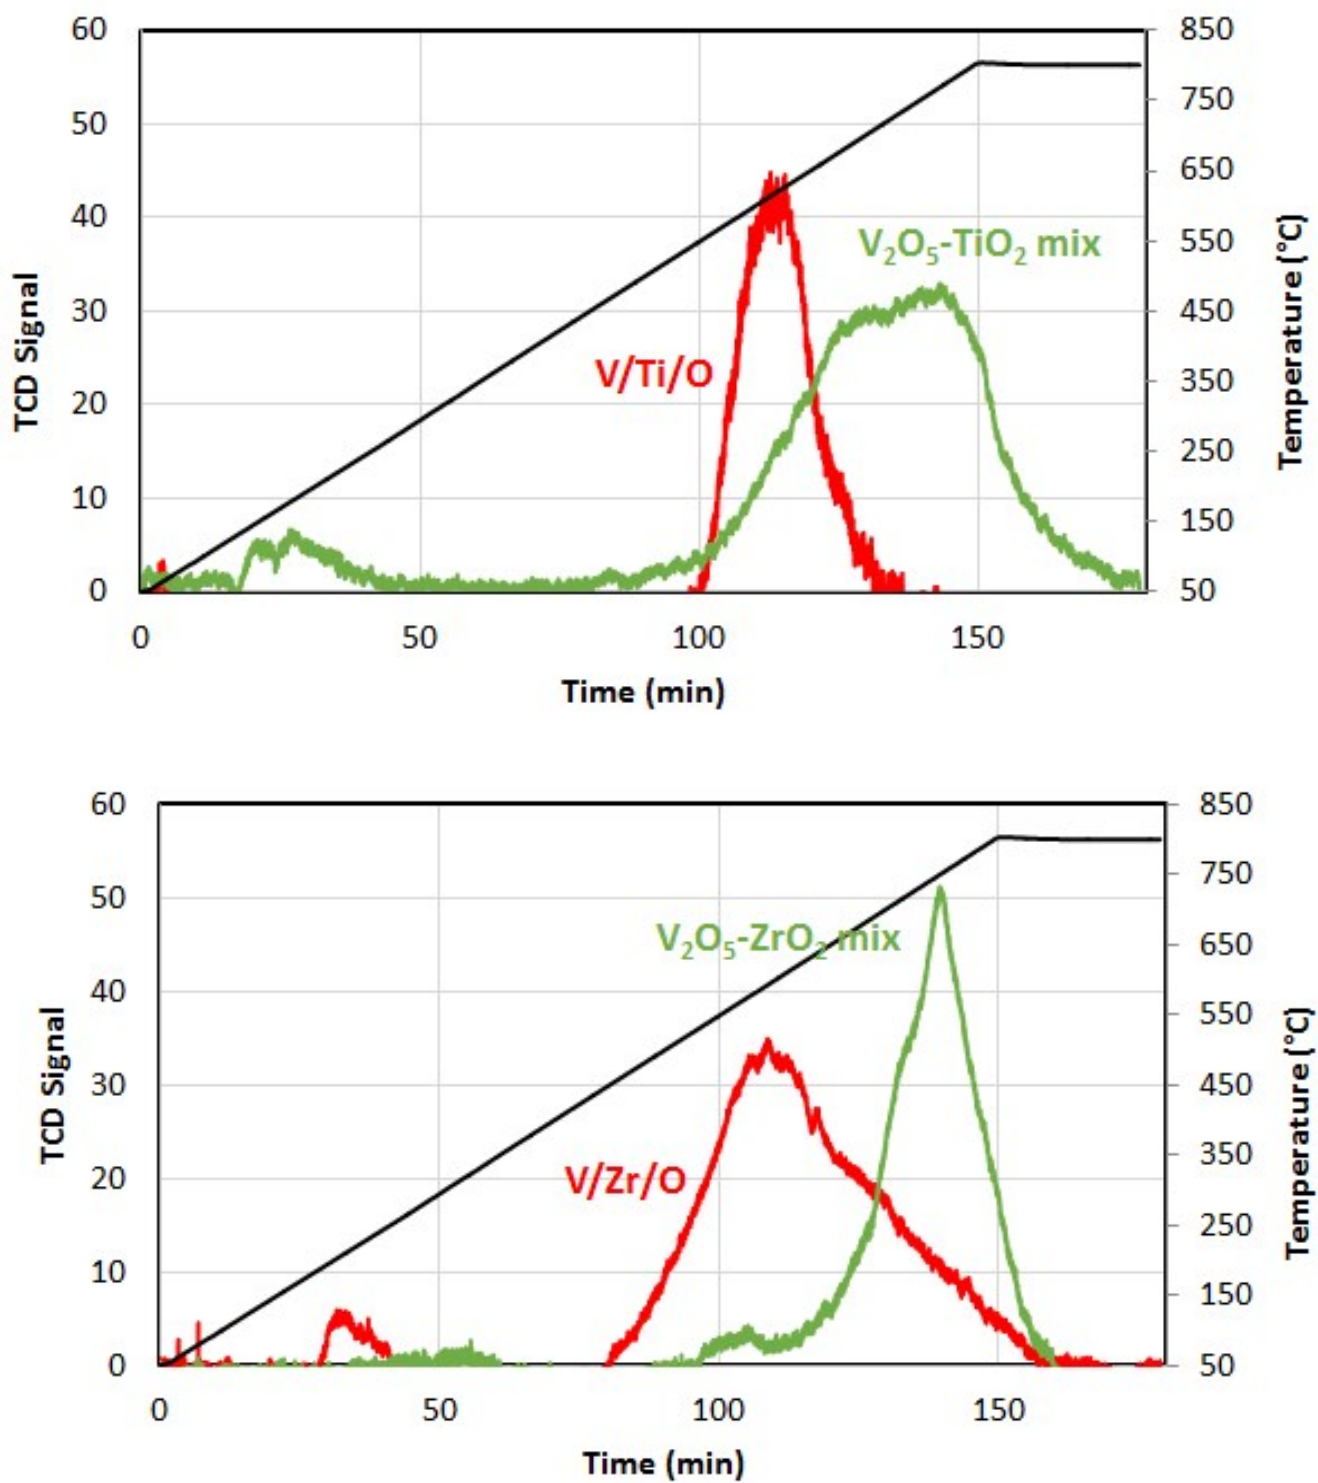

Figure S1. TPR profiles of V/Ti/O (top) and V/Zr/O (bottom) catalysts, and profiles of two reference catalysts prepared by mixing and calcination of 7 wt% V<sub>2</sub>O<sub>5</sub> with bare supports.

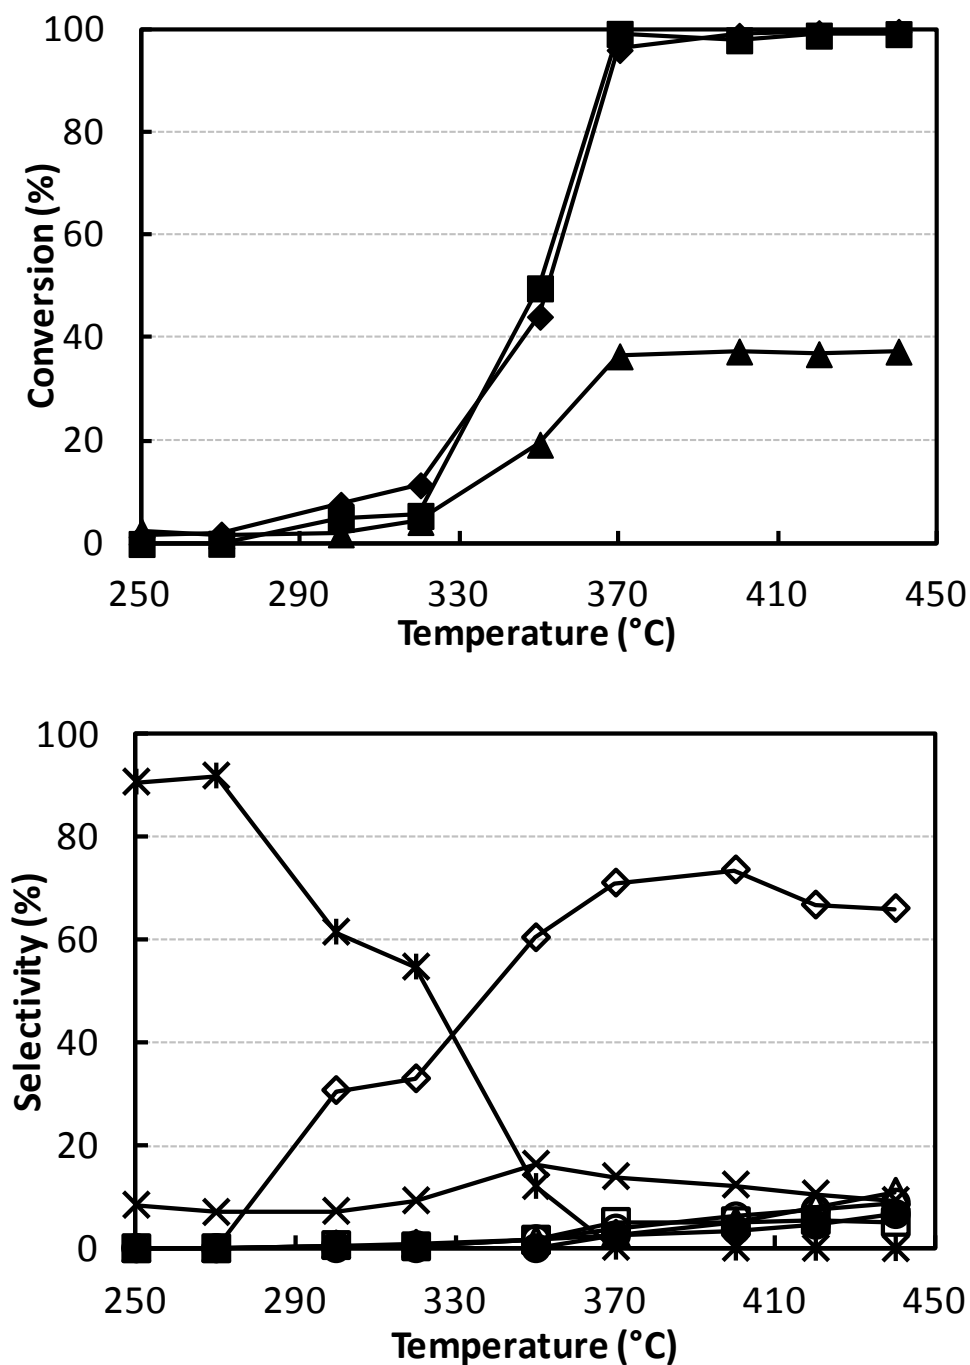

Figure S2. Effect of temperature on reactant conversion (top figure) and on selectivity to products (bottom figure). Reaction conditions: W/F ratio  $0.1 \text{ g s mL}^{-1}$ , feed composition (molar %): ethanol (azeotrope)/ammonia/oxygen 5/13/6. Symbols: ethanol conversion ( $\oplus$ ), ammonia conversion ( $\square$ ) and oxygen conversion ( $\ominus$ ). Selectivity to: acetonitrile ( $*$ ), acetaldehyde ( $\ominus$ ), ethylene ( $\square$ ), CO ( $\infty$ ), CO<sub>2</sub> ( $\otimes$ ), HCN ( $\bullet$ ) and N<sub>2</sub> (calculated with respect to converted ammonia) ( $\otimes$ ). Catalyst V/Zr/O.

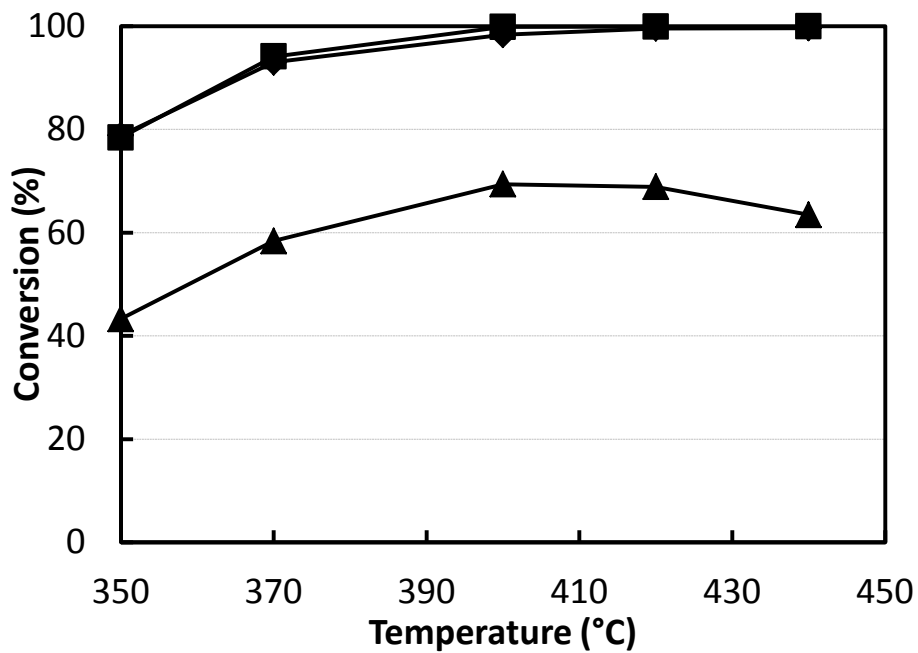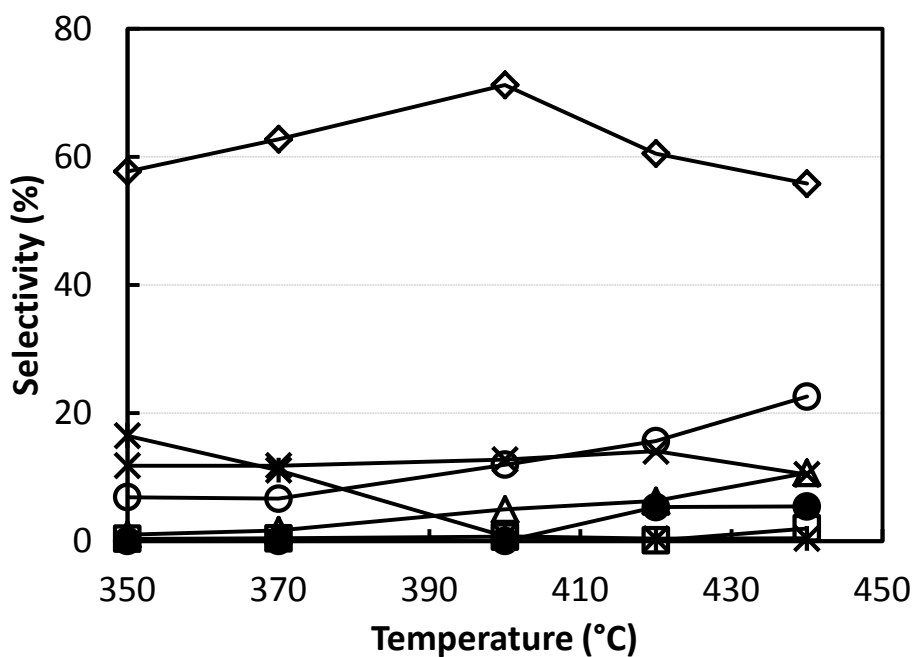

Figure S3. Effect of temperature on reactant conversion (top figure) and on selectivity to products (bottom figure). Reaction conditions: W/F ratio  $0.1 \text{ g s mL}^{-1}$ , feed composition (molar %): ethanol (azeotrope)/ammonia/oxygen 10/12/10. Symbols: ethanol conversion ( $\oplus$ ), ammonia conversion ( $\blacksquare$ ) and oxygen conversion ( $\bullet$ ). Selectivity to: acetonitrile ( $*$ ), acetaldehyde ( $\ominus$ ), ethylene ( $\square$ ), CO ( $\infty$ ), CO<sub>2</sub> ( $\otimes$ ), HCN ( $\bullet$ ) and N<sub>2</sub> (calculated with respect to converted ammonia) ( $\otimes$ ). Catalyst V/Zr/O.

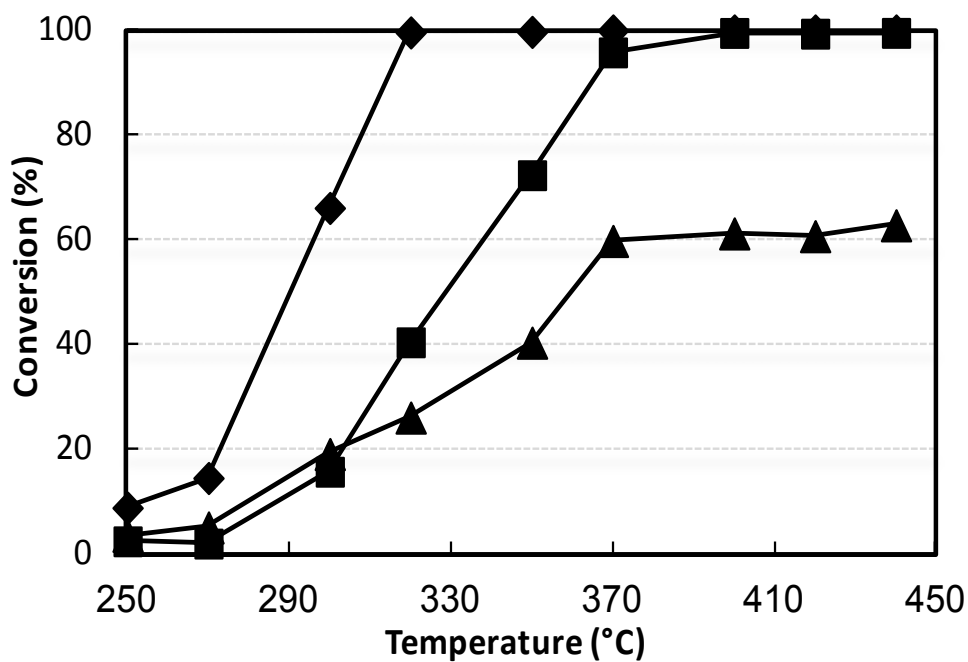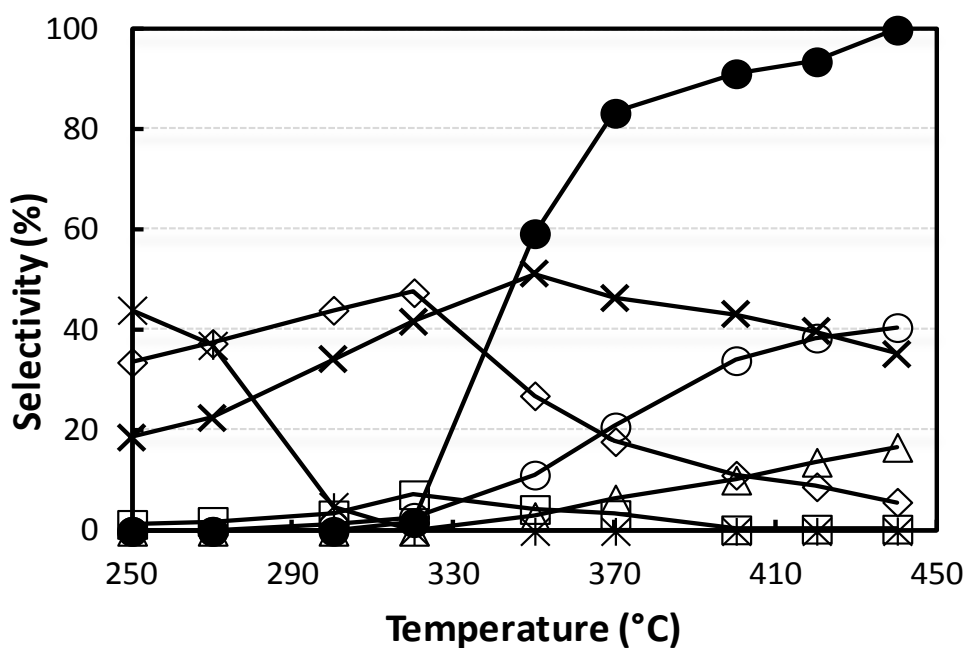

Figure S4. Effect of temperature on reactant conversion (top figure) and on selectivity to products (bottom figure). Reaction conditions: W/F ratio 0.8 g s mL<sup>-1</sup>, feed composition (molar %): ethanol (azeotrope)/ammonia/oxygen/inert 5/13/13/69. Symbols: ethanol conversion (⊕), ammonia conversion (◻) and oxygen conversion (●). Selectivity to: acetonitrile (\*), acetaldehyde (⊕), ethylene (◻), CO (⊕), CO<sub>2</sub> (⊕), HCN (●) and N<sub>2</sub> (calculated with respect to converted ammonia) (⊕). Catalyst V/Ti/O.

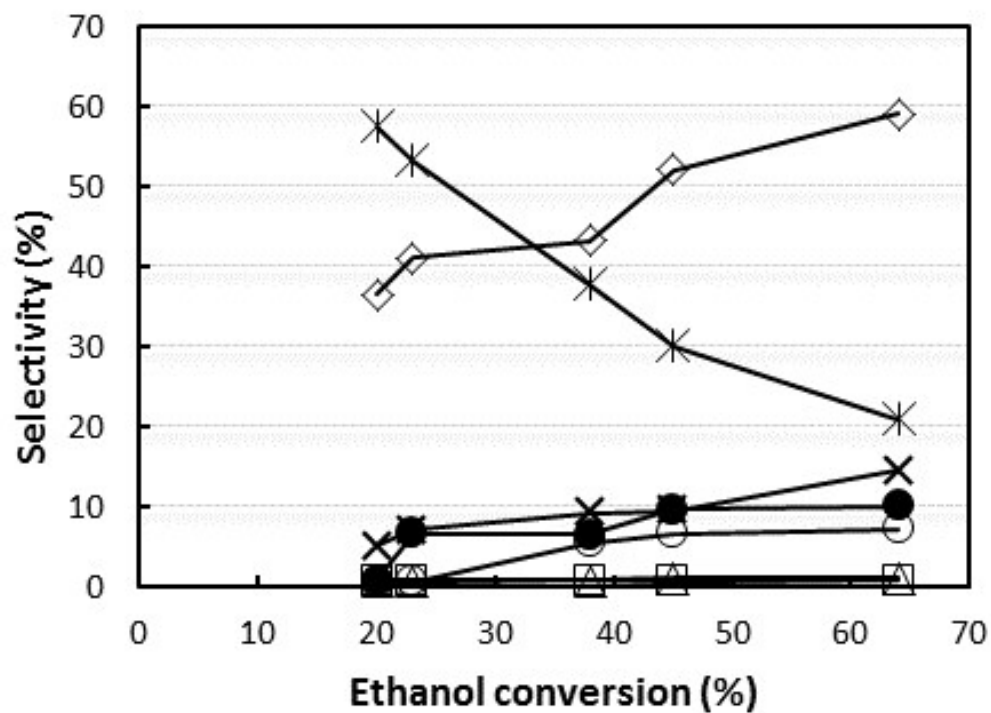

Figure S5. Effect of conversion on selectivity to products. Reaction conditions: temperature 320°C, feed composition (molar %): ethanol (azeotrope)/ammonia/oxygen 1.4/3.6/1.7. Contact time was varied. Symbols: Selectivity to: acetonitrile (\*), acetaldehyde (⊖), ethylene (□), CO (∞), CO<sub>2</sub> (⊗), HCN (●) and N<sub>2</sub> (calculated with respect to converted ammonia) (⊘). Catalyst V/Ti/O.

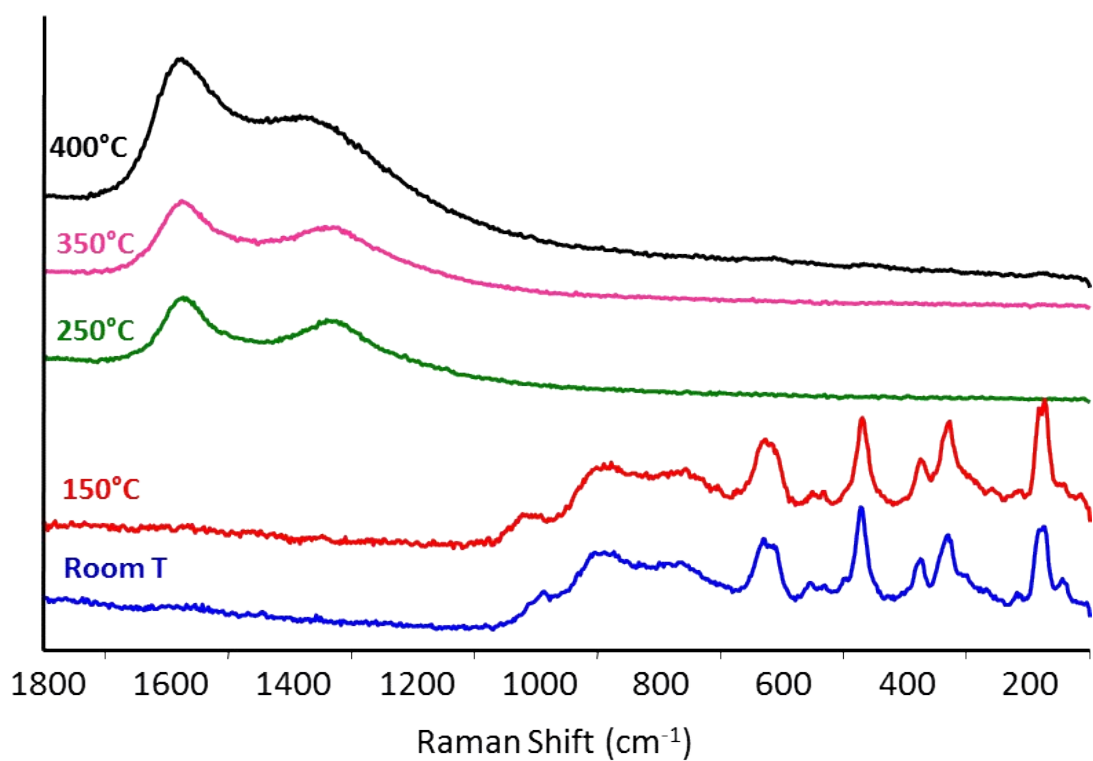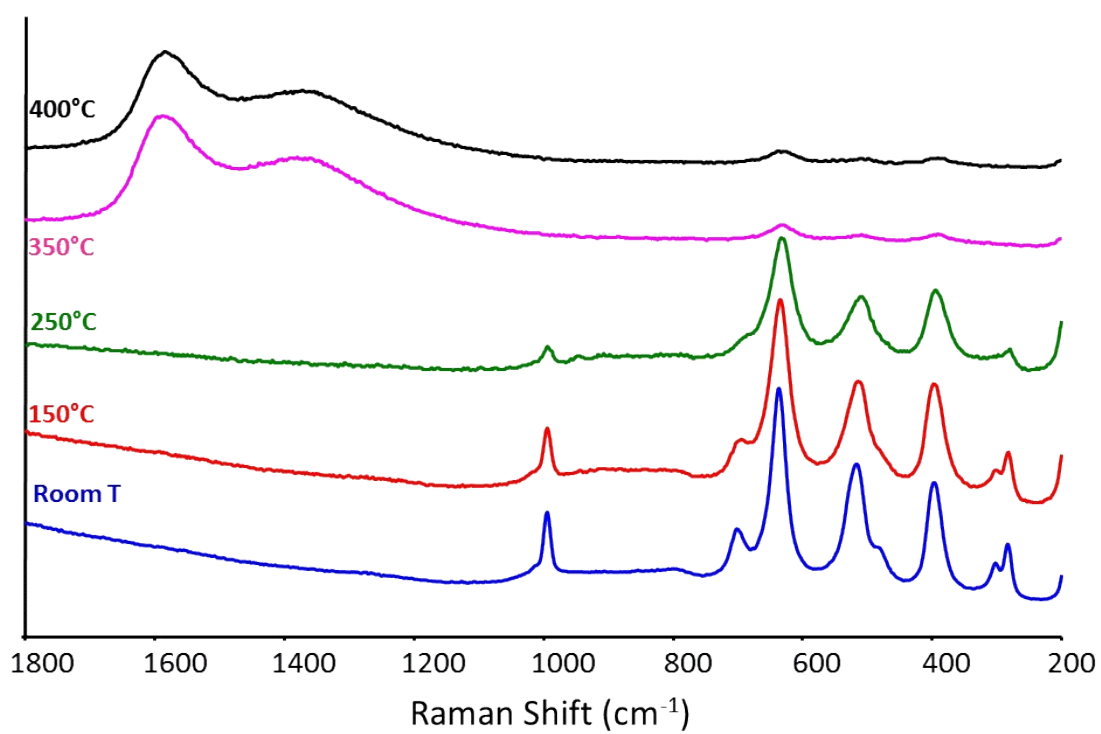

Figure S6. Raman spectra recorded while heating samples under an ethanol/He feed. Catalysts: V/Zr/O (top) and V/Ti/O (bottom).



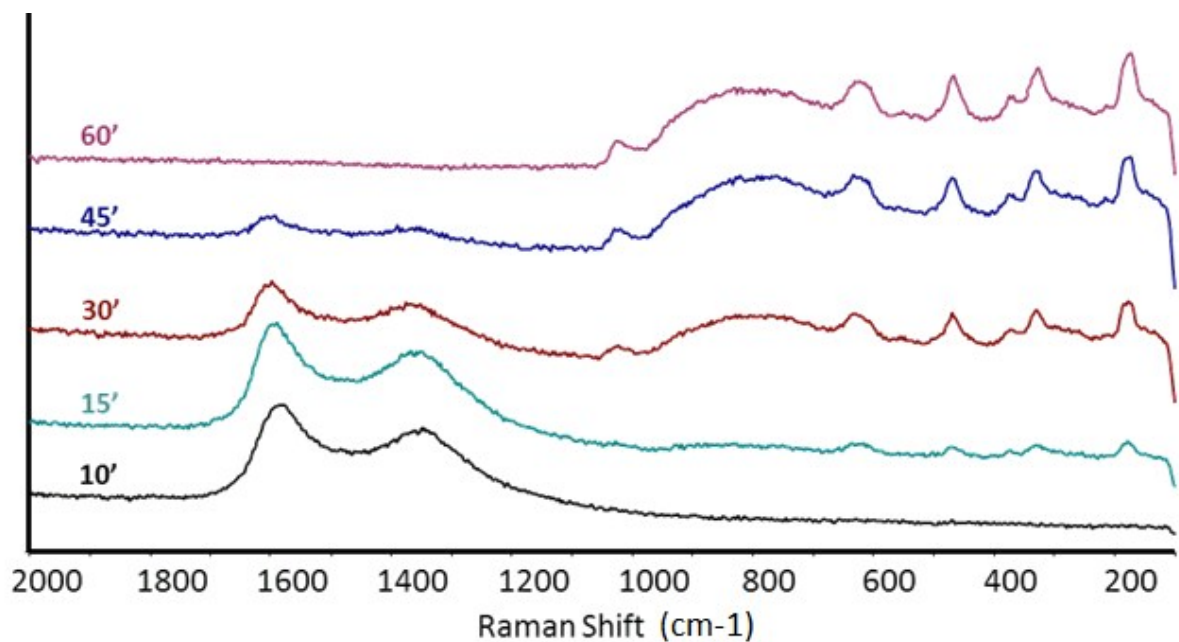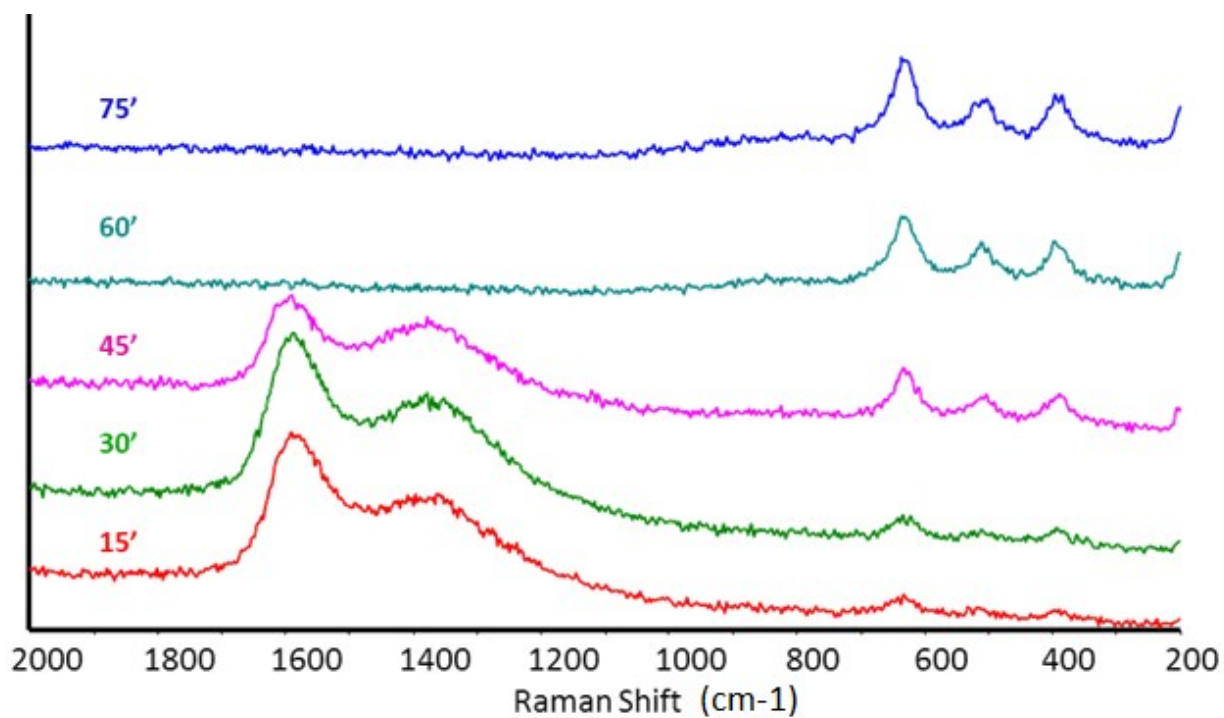

Figure S7. Raman spectra recorded at 400°C in N<sub>2</sub> flow after recording of spectra reported in Figure S6. Catalysts: V/Zr/O (top) and V/Ti/O (bottom).

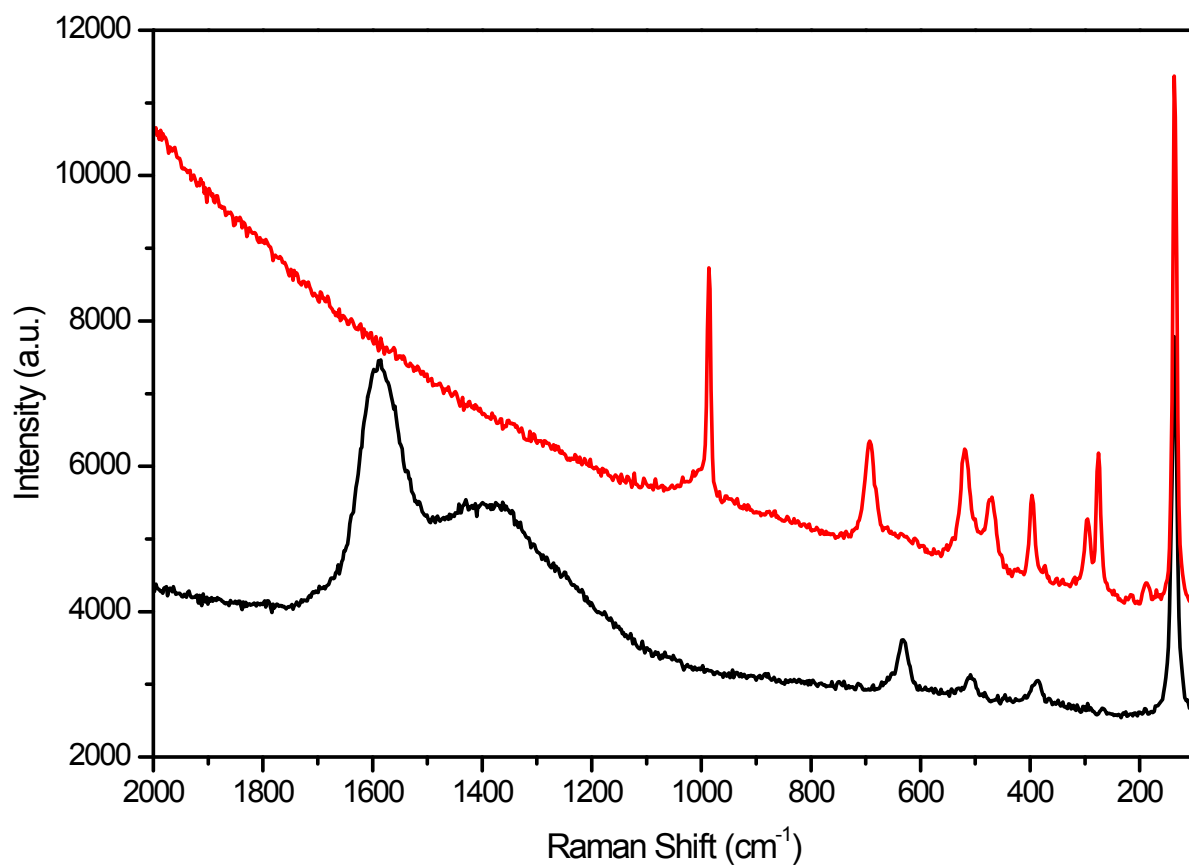

Figure S8. Raman spectra (recorded at 130°C) of used V/Zr/O (top) and V/Ti/O (bottom) catalysts after experiments carried out with ethanol/air feed.

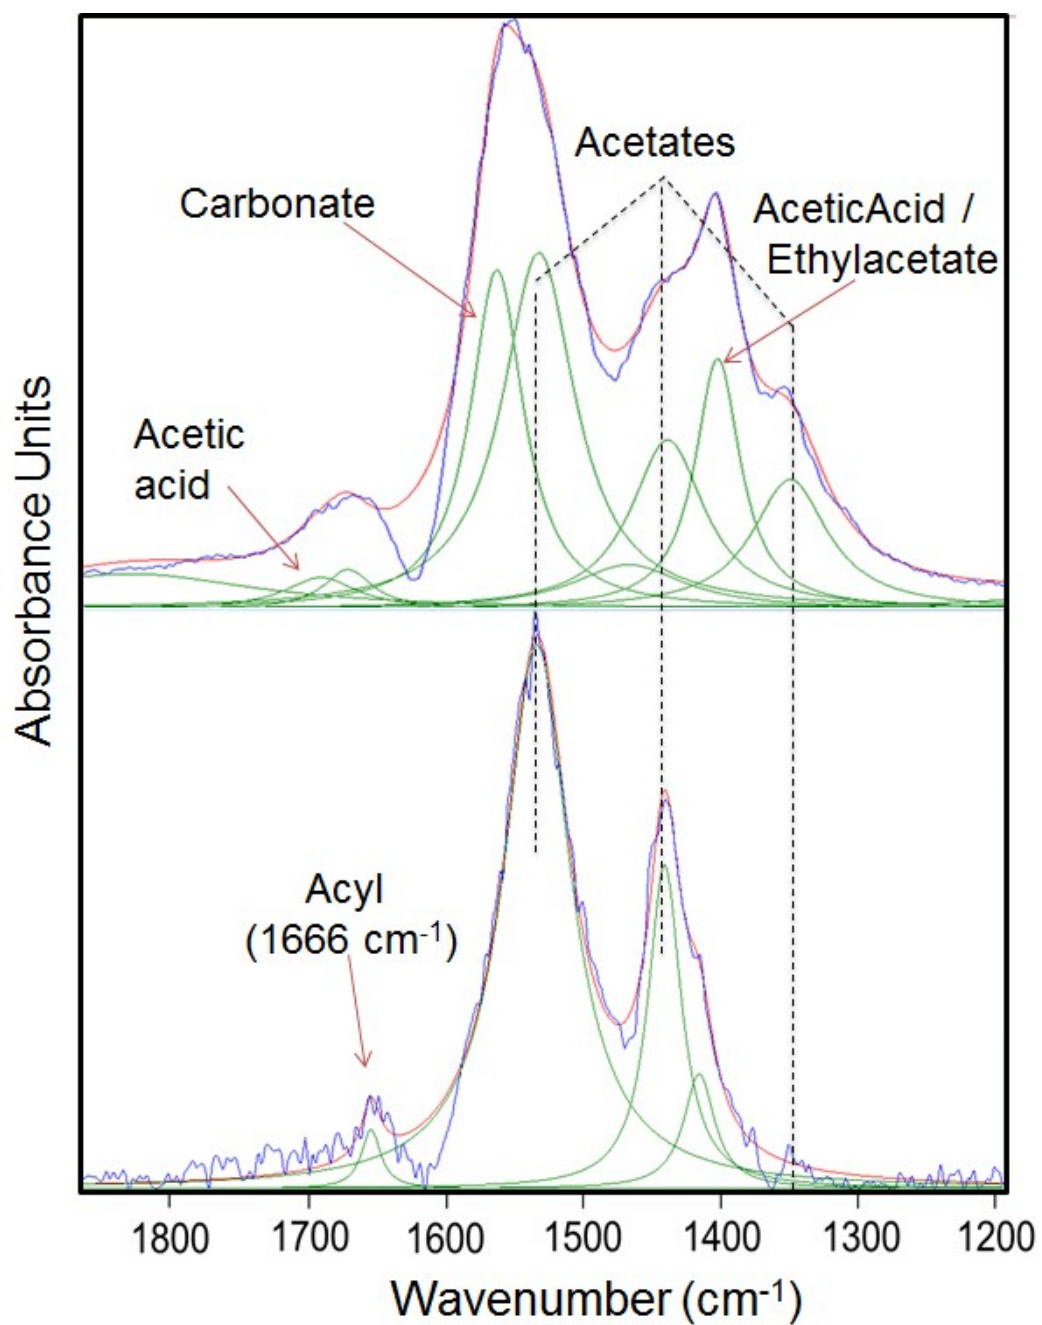

Figure S9. Detail of the DRIFT spectra recorded at 350°C for V/Ti/O (bottom) and V/Zr/O (top) catalysts after adsorption of ethanol.
